# Supplementary material for: Characterization of fusion genes in common and rare epithelial ovarian cancer histologic subtypes
Source: PubMed Central journal article supplement (PMC5564530; doi:10.18632/oncotarget.16781), 2017-04-01
Supplement: oncotarget-08-46891-s001.pdf [file oncotarget-08-46891-s001.pdf]

# Characterization of fusion genes in common and rare epithelial ovarian cancer histologic subtypes

## Supplementary Materials

### UBAP1-TGM7 Fusion

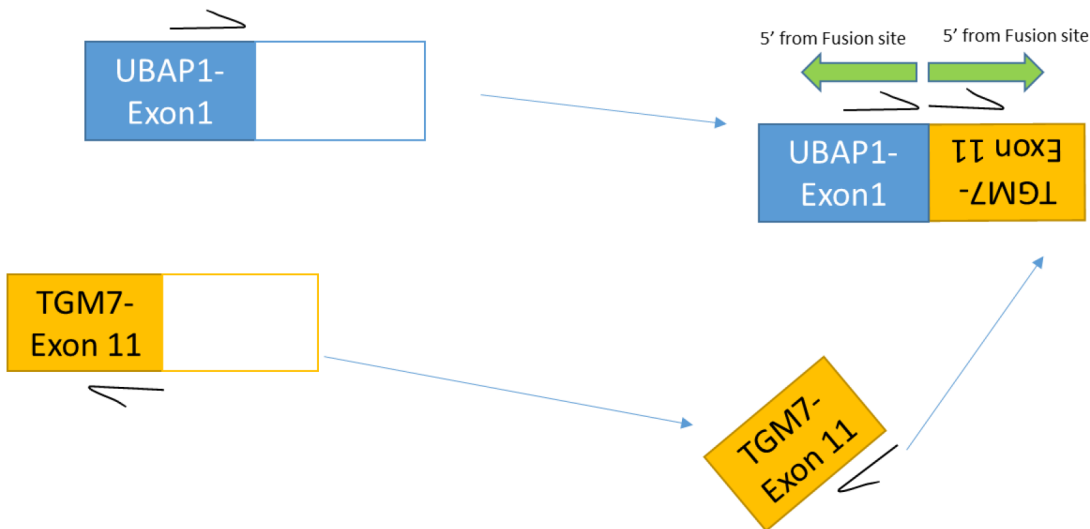

AATAGGACTCGCTGCTAACTCTTTGGGCATACCTTCGCGATTCAAGGCTCTTGGGTTTCCCGCTTTGGCCGCTCGCCAAACCAAGTCTTACACTCTTAGTG  
 ACCCCCTCTTTCTCCTTCCCCCTTAGGTCAGCAGGGTTACTCATTCCAATTGCAATGCTCCATGTTGCCGGAGTAGCTCCTCGCTAGAAGAGAGATTAGTT  
 ATGTCACCGTCGGCTCCTCCATTGGTCCGGGCGTGTGGAGCGCGGCCATGACGTGACAGCGCCAAATGAGTGGGGCGGTGAGGGGAAGGAGGAGGG  
 AAGTAGGACTTCAACATGGCGGCTGCGGCACTGGCGGTGGCTACGGTGACGGCTGGCCCGGAGCGGGCAGAGTTGGAGGTGGTGGCGTTTCGCTCTCCC  
 TAGGGGCTGTCGGGAGCTCAGCGGGGACCGAGCCTGGGAGGCCGGCCGTTGCCAGCACCTTCGGCTTCTGAGACGGCGGCAGCAGCGGCATT**CAGGA**  
**TC**CCTGAGGAGAGAGCTGTCTTCAAGGCTTCTCGGAAAATGCTGGGCCCCAAAGAGCTTCTTTGCCCTTCTGGATCTCTGGAGTCTGGGGGTCTT  
 AGGGATCAGCCAGCGCAGCTGCAGCTTACCTGGCCAGGATACCGAGTGGGGCCAGGACCTGCAGCTGTGCTGCTGATCCAGAGGGTCCAGACAGCA  
 CCCACCCTCGGGGCCCCATCGGACTGGTGTGCGCTTCTGTGCACAGGCCCTGCTGCATGGGGTGGTACCCAGAAGCCCTTCTGGAGGCACACAGTGCG  
 GATGAACCTGGACTTTGGGAAGGGTGAGTGTGAGGCAGGCCTGAGAAGGCACCTACAGGGAGGGGAGCTGTGGTCCATGAACACAGTGGGGTGGGCC  
 CAGCCAGATTACACAGACCCCTTCTCCAACACACACATTCTGGCAGTGAAGCTGCCAGCTGCTGCACCTTGATGCCACCCACCAGGGGAGA

Supplementary Figure 1: UBAP1-TGM7 fusion location.

Supplementary Table 1: Fusion genes identified in EOC tumor samples and passing filtering steps.  
 See Supplementary\_Table\_1

Supplementary Table 2: Detailed tumor sample information. See Supplementary\_Table\_2

**Supplementary Table 3: Detailed normal sample information**

| <b>Participant No.</b> | <b>Source</b> | <b>Organ Site</b> | <b>Batch</b> | <b>No. Fusions Detected</b> | <b>No. Mapped Reads</b> |
|------------------------|---------------|-------------------|--------------|-----------------------------|-------------------------|
| N1                     | Mayo Clinic   | Ovary             | 1            | 0                           | 51907112                |
| N2                     | Mayo Clinic   | Ovary             | 1            | 0                           | 18324526                |
| N3                     | Mayo Clinic   | Ovary             | 1            | 0                           | 52038734                |
| N4                     | Mayo Clinic   | Ovary             | 1            | 1                           | 34403746                |
| N5                     | Mayo Clinic   | Ovary             | 1            | 0                           | 34839661                |
| N6                     | Mayo Clinic   | Endometrium       | 1            | 0                           | 30223837                |
| N7                     | Mayo Clinic   | Omentum           | 1            | 0                           | 28672340                |
| N8                     | GTEEx         | Ovary             | NA           | 0                           | 73960262                |
| N9                     | GTEEx         | Ovary             | NA           | 0                           | 61642790                |
| N10                    | GTEEx         | Ovary             | NA           | 2                           | 62525368                |
| N11                    | GTEEx         | Ovary             | NA           | 2                           | 77658463                |
| N12                    | GTEEx         | Ovary             | NA           | 7                           | 73018343                |
| N13                    | GTEEx         | Ovary             | NA           | 3                           | 72532953                |
| N14                    | GTEEx         | Ovary             | NA           | 2                           | 88520755                |
| N15                    | GTEEx         | Ovary             | NA           | 0                           | 60244888                |
| N16                    | GTEEx         | Ovary             | NA           | 1                           | 77595569                |
| N17                    | GTEEx         | Ovary             | NA           | 6                           | 90730304                |

**Supplementary Table 4: RNA-seq batch (1–4) features**

|         | <b>Library Preparation</b>                        | <b>RNA selection</b>     | <b>Sequencing Centre</b>                                         | <b>Read Length</b> | <b>Average Mapped Reads (<math>\pm</math> s.d)</b> | <b>Number of Tumor Samples</b> | <b>Number of Normal Samples</b> |
|---------|---------------------------------------------------|--------------------------|------------------------------------------------------------------|--------------------|----------------------------------------------------|--------------------------------|---------------------------------|
| Batch 1 | TruSeq Stranded Total RNA Library Preparation Kit | Total RNA, rRNA depleted | BGI Americas (Beijing, China)                                    | 101                | 45,128,496 $\pm$ 12,667,304                        | 95                             | 7                               |
| Batch 2 | TruSeq Stranded Total RNA Library Preparation Kit | Total RNA, rRNA depleted | Epigenome Core, University of South California (Los Angeles, CA) | 50                 | 86,799,336 $\pm$ 23,817,596                        | 17                             | 0                               |
| Batch 3 | TruSeq RNA Library Preparation Kit v2             | mRNA                     | Medical Genome Facility, Mayo Clinic (Rochester, MN)             | 101                | 79,484,713 $\pm$ 7,226,239                         | 30                             | 0                               |
| Batch 4 | TruSeq RNA Library Preparation Kit v2             | mRNA                     | Medical Genome Facility, Mayo Clinic (Rochester, MN)             | 101                | 100,847,048 $\pm$ 18,454,007                       | 78                             | 0                               |
